# Supplementary material for: Adsorption and reactions of NO molecules on anionic gold clusters in the size range below 1 nm: effects of clusters’ global electronic properties
Source: Royal Society of Chemistry journal article supplement (doi:10.1039/d0cp03711g), 2020-01-01

Fig. S3 the data of  $-\ln(I/I_0)$  vs NO flows for the active clusters in the reactions between  $Au_n^-$  ( $n = 1-20$ ) and NO at 150K (shown in Fig S1). The linear fitting of each set of data was carried out according to the equation  $-\ln(I/I_0)=k[NO]t$ . The slopes from these fitting processes corresponded to the  $kt$ . Since the reaction time  $t$  is identical for all  $Au_n^-$  in one measurement, the slopes were in proportional to the relative kinetic rates  $k$  in the initial reaction steps of  $Au_n^-$ .

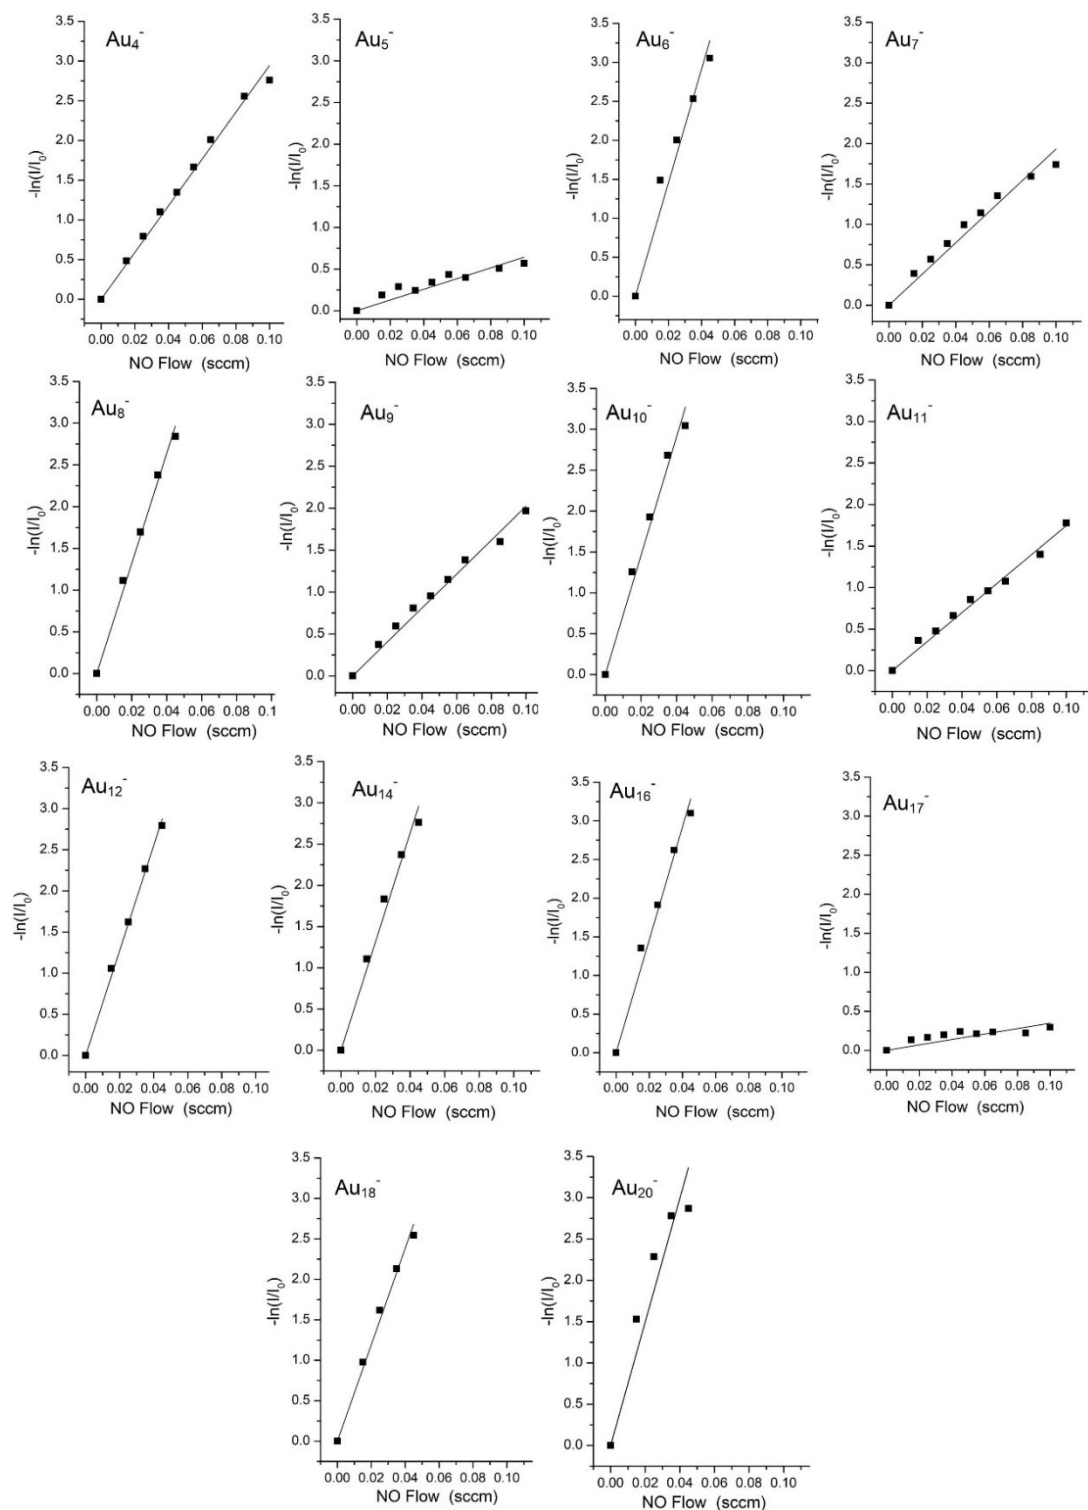

Supplement: d0cp03711g3.pdf [file d0cp03711g3.pdf]
