# Supplementary material for: Adsorption and reactions of NO molecules on anionic gold clusters in the size range below 1 nm: effects of clusters’ global electronic properties
Source: Royal Society of Chemistry journal article supplement (doi:10.1039/d0cp03711g), 2020-01-01
Supplement: d0cp03711g5.pdf [file d0cp03711g5.pdf]

Table S1 the slopes and the relative rates from linear fitting of  $-\ln(I/I_0)$  vs NO flows for the clusters shown in Fig.S1 and Fig.S3.

| <b>Au<sub>n</sub><sup>-</sup></b><br><b>n=</b> | <b>The Slopes of</b><br><b>linear fittings</b> | <b>Relative rates</b><br><b>(Normalized to the</b><br><b>slope of Au<sub>20</sub><sup>-</sup>)</b> |
|------------------------------------------------|------------------------------------------------|----------------------------------------------------------------------------------------------------|
| 1                                              | --                                             | <0.01                                                                                              |
| 2                                              | --                                             | <0.01                                                                                              |
| 3                                              | --                                             | <0.01                                                                                              |
| 4                                              | 1.473 ± 0.026                                  | 0.394 ± 0.007                                                                                      |
| 5                                              | 0.321 ± 0.022                                  | 0.086 ± 0.006                                                                                      |
| 6                                              | 3.640 ± 0.192                                  | 0.974 ± 0.052                                                                                      |
| 7                                              | 0.966 ± 0.033                                  | 0.258 ± 0.009                                                                                      |
| 8                                              | 3.296 ± 0.077                                  | 0.882 ± 0.021                                                                                      |
| 9                                              | 1.011 ± 0.023                                  | 0.270 ± 0.007                                                                                      |
| 10                                             | 3.634 ± 0.130                                  | 0.972 ± 0.035                                                                                      |
| 11                                             | 0.873 ± 0.019                                  | 0.234 ± 0.006                                                                                      |
| 12                                             | 3.189 ± 0.053                                  | 0.853 ± 0.015                                                                                      |
| 13                                             | --                                             | <0.01                                                                                              |
| 14                                             | 3.289 ± 0.121                                  | 0.880 ± 0.033                                                                                      |
| 15                                             | --                                             | <0.01                                                                                              |
| 16                                             | 3.651 ± 0.133                                  | 0.977 ± 0.036                                                                                      |
| 17                                             | 0.173 ± 0.020                                  | 0.046 ± 0.006                                                                                      |
| 18                                             | 2.978 ± 0.083                                  | 0.797 ± 0.023                                                                                      |
| 19                                             | --                                             | <0.01                                                                                              |
| 20                                             | 3.738 ± 0.306                                  | 1.000 ± 0.082                                                                                      |
