# Supplementary material for: Adsorption and reactions of NO molecules on anionic gold clusters in the size range below 1 nm: effects of clusters’ global electronic properties
Source: Royal Society of Chemistry journal article supplement (doi:10.1039/d0cp03711g), 2020-01-01
Supplement: d0cp03711g6.pdf [file d0cp03711g6.pdf]

Table S2 the slopes and the relative rates from linear fitting of  $-\ln(I/I_0)$  vs NO flows for the clusters shown in Fig.S2 and Fig.S4.

| <b>Au<sub>n</sub><sup>-</sup></b><br><b>n=</b><br><b>10-44</b> | <b>The Slopes of</b><br><b>linear fitting</b> | <b>Relative rates</b><br><b>(Normalized to the</b><br><b>slope of Au<sub>20</sub>)</b> |
|----------------------------------------------------------------|-----------------------------------------------|----------------------------------------------------------------------------------------|
| 10                                                             | 0.668 ± 0.049                                 | 0.820 ± 0.061                                                                          |
| 11                                                             | 0.167 ± 0.009                                 | 0.205 ± 0.012                                                                          |
| 12                                                             | 0.595 ± 0.052                                 | 0.730 ± 0.064                                                                          |
| 13                                                             | --                                            | < 0.01                                                                                 |
| 14                                                             | 0.663 ± 0.030                                 | 0.813 ± 0.037                                                                          |
| 15                                                             | --                                            | < 0.01                                                                                 |
| 16                                                             | 0.746 ± 0.043                                 | 0.915 ± 0.053                                                                          |
| 17                                                             | 0.059 ± 0.002                                 | 0.072 ± 0.003                                                                          |
| 18                                                             | 0.580 ± 0.031                                 | 0.712 ± 0.039                                                                          |
| 19                                                             | --                                            | < 0.01                                                                                 |
| 20                                                             | 0.815 ± 0.054                                 | 1.000 ± 0.067                                                                          |
| 21                                                             | --                                            | < 0.01                                                                                 |
| 22                                                             | 0.602 ± 0.020                                 | 0.739 ± 0.025                                                                          |
| 23                                                             | --                                            | < 0.01                                                                                 |
| 24                                                             | 0.544 ± 0.022                                 | 0.667 ± 0.027                                                                          |
| 25                                                             | --                                            | < 0.01                                                                                 |
| 26                                                             | 0.279 ± 0.014                                 | 0.342 ± 0.018                                                                          |
| 27                                                             | --                                            | < 0.01                                                                                 |
| 28                                                             | 0.285 ± 0.011                                 | 0.350 ± 0.014                                                                          |
| 29                                                             | --                                            | < 0.01                                                                                 |
| 30                                                             | 0.502 ± 0.027                                 | 0.616 ± 0.034                                                                          |
| 31                                                             | --                                            | < 0.01                                                                                 |
| 32                                                             | --                                            | < 0.01                                                                                 |
| 33                                                             | --                                            | < 0.01                                                                                 |
| 34                                                             | --                                            | < 0.01                                                                                 |
| 35                                                             | --                                            | < 0.01                                                                                 |
| 36                                                             | 0.366 ± 0.043                                 | 0.449 ± 0.053                                                                          |
| 37                                                             | --                                            | < 0.01                                                                                 |
| 38                                                             | 0.241 ± 0.010                                 | 0.296 ± 0.013                                                                          |
| 39                                                             | --                                            | < 0.01                                                                                 |
| 40                                                             | 0.158 ± 0.008                                 | 0.194 ± 0.010                                                                          |
| 41                                                             | --                                            | < 0.01                                                                                 |
| 42                                                             | 0.117 ± 0.009                                 | 0.144 ± 0.012                                                                          |
| 43                                                             | --                                            | < 0.01                                                                                 |
| 44                                                             | 0.199 ± 0.012                                 | 0.244 ± 0.015                                                                          |

---

|    |               |               |
|----|---------------|---------------|
| 45 | --            | < 0.02        |
| 46 | 0.073 ± 0.008 | 0.09 ± 0.010  |
| 47 | --            | < 0.02        |
| 48 | 0.069 ± 0.003 | 0.085 ± 0.004 |
| 49 | 0.060 ± 0.004 | 0.074 ± 0.005 |
| 50 | 0.069 ± 0.004 | 0.085 ± 0.005 |
| 51 | --            | < 0.02        |
| 52 | 0.046 ± 0.003 | 0.056 ± 0.004 |
| 53 | --            | < 0.02        |
| 54 | 0.045 ± 0.003 | 0.055 ± 0.004 |
| 55 | --            | < 0.02        |
| 56 | --            | < 0.02        |
| 57 | --            | < 0.02        |
| 58 | --            | < 0.02        |
| 59 | --            | < 0.02        |
| 60 | 0.063 ± 0.003 | 0.077 ± 0.004 |
| 61 | 0.055 ± 0.003 | 0.067 ± 0.004 |
| 62 | 0.053 ± 0.005 | 0.065 ± 0.007 |
| 63 | --            | < 0.02        |
| 64 | 0.109 ± 0.003 | 0.134 ± 0.007 |
| 65 | --            | < 0.02        |
| 66 | 0.111 ± 0.010 | 0.136 ± 0.013 |
| 67 | --            | < 0.02        |
| 68 | 0.081 ± 0.005 | 0.099 ± 0.007 |
| 69 | --            | < 0.02        |
| 70 | 0.071 ± 0.002 | 0.087 ± 0.003 |
| 71 | --            | < 0.02        |
| 72 | 0.078 ± 0.003 | 0.096 ± 0.004 |
| 73 | --            | < 0.02        |
| 74 | 0.039 ± 0.002 | 0.048 ± 0.003 |
| 75 | --            | < 0.02        |
| 76 | 0.112 ± 0.005 | 0.137 ± 0.007 |
| 77 | --            | < 0.02        |
| 78 | 0.056 ± 0.003 | 0.069 ± 0.004 |
| 79 | --            | < 0.02        |
| 80 | 0.040 ± 0.010 | 0.049 ± 0.013 |

---
